# Supplementary material for: Biogeochemistry of the North Atlantic during oceanic anoxic event 2: role of changes in ocean circulation and phosphorus input
Source: Copernicus journal article supplement (doi:10.5194/bg-11-977-2014), 2014-02-20
Supplement: Supplementary file 1 [file bg-11-977-2014-supplement.pdf]

# Biogeochemistry of the North Atlantic during Oceanic Anoxic Event 2: role of changes in ocean circulation and phosphorus input

I. Ruvalcaba Baroni<sup>1</sup>, R. P. M. Topper<sup>1</sup>, N. A. G. M. van Helmond<sup>1</sup>, H. Brinkhuis<sup>1,2</sup>, and C. P. Slomp<sup>1</sup>

<sup>1</sup>Utrecht University, Faculty of Geosciences, The Netherlands

<sup>2</sup>Royal Netherlands Institute for Sea Research (NIOZ), Den Burg, Texel, The Netherlands

December 4, 2013

## Supplementary Information

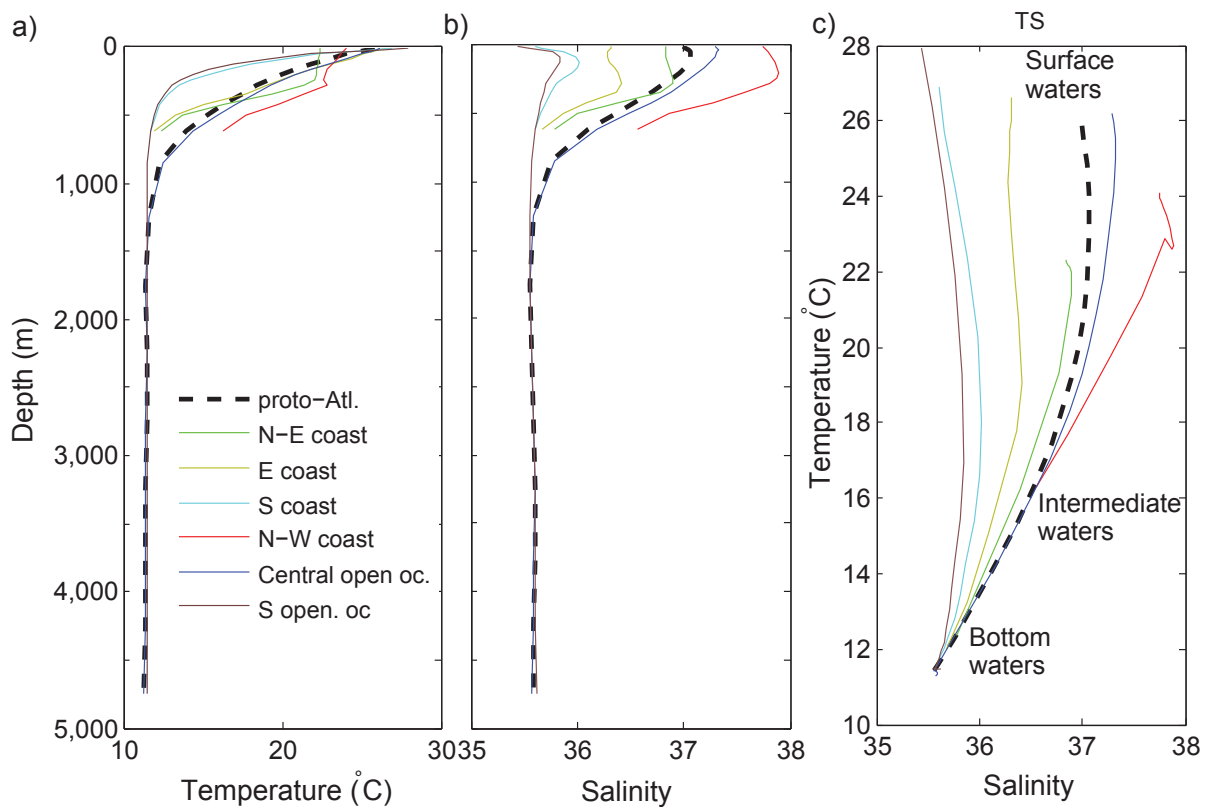

Figure S1: Profiles of a) mean temperature and b) salinity and c) a temperature (T)-salinity (S) diagram for several regions of the proto-North Atlantic, where the basin average is also shown with a dashed line (Topper et al., 2011). The TS diagram highlights that the proto-North Atlantic was poorly stratified. Note that the temperatures may be underestimated since the model uses yearly averaged air temperature as its forcing.

Table S1: Compilation of particulate organic carbon (POC) contents and various proxies for redox conditions such as POC/ $P_{TOT}$  ratios, biomarkers, trace metals (TM) and indicators for bioturbation for pre-OAE2 and OAE2 sediments in the proto-North Atlantic.

| Sites                          | Location               | Depth (m) | POC (wt%)                  |                           | POC/ $P_{TOT}$        |                          | Biomarkers, TM                 |                                                                                                                             |  |
|--------------------------------|------------------------|-----------|----------------------------|---------------------------|-----------------------|--------------------------|--------------------------------|-----------------------------------------------------------------------------------------------------------------------------|--|
|                                |                        |           | pre-OAE2                   | OAE2                      | pre-OAE2              | OAE2                     | pre-OAE2                       | OAE2                                                                                                                        |  |
| <b>CENTRAL OPEN OCEAN</b>      |                        |           |                            |                           |                       |                          |                                |                                                                                                                             |  |
| 105                            | Rise hill              | 4100      | ~3 <sup>[25]</sup>         | 9.5 <sup>[3]</sup>        | n.a.                  | n.a.                     | low Mo <sup>[30]</sup>         | rise in Mo <sup>[30]</sup> , bioturbation <sup>[8,25]</sup>                                                                 |  |
| 603                            | Cape Hatteras          | 4000      | 0.5-1 <sup>[1]</sup>       | 3 <sup>[2]</sup>          | n.a.                  | 330 <sup>[2]</sup>       | low Mo <sup>[30]</sup>         | rise in Mo <sup>[30]</sup> , bioturbation <sup>[8,25]</sup> ,<br>low isoren. <sup>[25,32]</sup> , TM enrich <sup>[25]</sup> |  |
| 417                            | Hatteras Abyssal Plain | 5500      | n.d.                       | 5.8 <sup>[3]</sup>        | n.a.                  | n.a.                     |                                | TM enrich <sup>[4]</sup>                                                                                                    |  |
| 638-641                        | Galicia Bank           | >3000     | <0.5 <sup>[1]</sup>        | 11.3 <sup>[4,1,26]</sup>  | n.a.                  | n.a.                     |                                | low isoren. <sup>[31]</sup>                                                                                                 |  |
| 551                            | Goban Spur             | 1500      | n.d.                       | 6.5 <sup>[3]</sup>        | n.a.                  | n.a.                     |                                |                                                                                                                             |  |
| 1276                           | Newfoundland basin     | >2000     | <0.5 <sup>[5,6]</sup>      | 5 <sup>[5,6]</sup>        | n.a.                  | n.a.                     |                                |                                                                                                                             |  |
| 135                            |                        | >2000     | n.d.                       | 7 <sup>[7]</sup>          | n.a.                  | n.a.                     |                                |                                                                                                                             |  |
| 138                            |                        | >2000     | n.d.                       | 7 <sup>[7,8]</sup>        | n.a.                  | n.a.                     |                                |                                                                                                                             |  |
| 386                            | Bermuda Rise           | <3200     | ~1 <sup>[33]</sup>         | >5 <sup>[33]</sup>        | n.a.                  | n.a.                     |                                |                                                                                                                             |  |
| 398                            | Galicia Plateau        | <700      | ~0.5 <sup>[1,22]</sup>     | 2.8 <sup>[1,22]</sup>     | n.a.                  | n.a.                     |                                |                                                                                                                             |  |
|                                | <i>AVERAGE</i>         |           | ~0.5                       | ~6.7                      |                       | 330                      |                                |                                                                                                                             |  |
| <b>SOUTHERN OPEN OCEAN</b>     |                        |           |                            |                           |                       |                          |                                |                                                                                                                             |  |
| 144                            |                        | 3000      | 5 <sup>[4]</sup>           | 6 <sup>[3]</sup>          | n.a.                  | n.a.                     | low isoren. <sup>[4]</sup>     | high isoren./chlorobac. <sup>[3,4]</sup>                                                                                    |  |
| 367                            | Cape Verde Basin       | 3700      | 6.4 <sup>[4]</sup>         | 21 <sup>[3,4]</sup>       | 227 <sup>[28]</sup>   | 552 <sup>[28]</sup>      | high Mo <sup>[30]</sup>        | high Mo <sup>[30]</sup>                                                                                                     |  |
| 368                            | Cape Verde Rise        | 3700      | n.d.                       | 9.2 <sup>[3]</sup>        | n.a.                  | n.a.                     | low isoren. <sup>[4]</sup>     | high Mo <sup>[30]</sup>                                                                                                     |  |
|                                | <i>AVERAGE</i>         |           | ~5.7                       | ~12.3                     | 227                   | 552                      | high Mo <sup>[30]</sup>        | high isoren. <sup>[3,32]</sup>                                                                                              |  |
| <b>SOUTHERN COAST</b>          |                        |           |                            |                           |                       |                          |                                |                                                                                                                             |  |
| 1258-1261                      | Demerara Rise          | 500-1500  | 7.6 <sup>[18]</sup>        | 15.6 <sup>[18]</sup>      | 114 <sup>[2]</sup>    | 730 <sup>[2]</sup>       | low isoren., chlorobac.        | high isoren., chlorobac., TM<br>enrich, high lyco./n-alkane <sup>[18]</sup>                                                 |  |
| $S_n$                          | Tarfaya Basin          | ~250      | 5.5 <sup>[2,4,19,20]</sup> | 8.5 <sup>[2,4,19]</sup>   | 160 <sup>[2,19]</sup> | 458 <sup>[2,27,19]</sup> | high Mo <sup>[30]</sup>        | high lyco./n-alkane <sup>[18]</sup> ,<br>high Ti/Al <sup>[29]</sup> , high Mo <sup>[30]</sup>                               |  |
|                                |                        |           |                            |                           |                       |                          | low isoren., chlorobac.        | high isoren., chlorobac.                                                                                                    |  |
|                                |                        |           |                            |                           |                       |                          | TM pick, high                  | mod. Mo <sup>[30]</sup> , TM enrich <sup>[20]</sup>                                                                         |  |
|                                |                        |           |                            |                           |                       |                          | lyco./n-alkane <sup>[20]</sup> | stable Fe <sub>7</sub> /Al and $\delta^{56}\text{Fe}_7$<br>and $\delta^{56}\text{Fe}_7$                                     |  |
|                                | Casamance Area         | <100      | 1 <sup>[8]</sup>           | 3.8 <sup>[8]</sup>        | n.a.                  | n.a.                     |                                |                                                                                                                             |  |
|                                | Agadir Basin           | <300      | n.a.                       | 4 <sup>[8]</sup>          | n.a.                  | n.a.                     |                                |                                                                                                                             |  |
|                                | <i>AVERAGE</i>         |           | 4.7                        | 8                         | 137                   | 594                      |                                |                                                                                                                             |  |
| <b>WESTERN INTERIOR SEAWAY</b> |                        |           |                            |                           |                       |                          |                                |                                                                                                                             |  |
| El pueblo                      | Colorado               | <700      | n.a.                       | 1 <sup>[9]</sup>          | n.a.                  | 250 <sup>[9]</sup>       |                                |                                                                                                                             |  |
| USGS                           | Portland Colorado      | <700      | n.a.                       | 2 <sup>[10]</sup>         | n.a.                  | n.a.                     |                                |                                                                                                                             |  |
|                                | Rock Canyon            | <700      | n.a.                       | 1.5 <sup>[11]</sup>       | n.a.                  | n.a.                     |                                |                                                                                                                             |  |
|                                | <i>AVERAGE</i>         |           |                            | 1.5                       |                       | 250                      |                                |                                                                                                                             |  |
| <b>NORTHERN COAST</b>          |                        |           |                            |                           |                       |                          |                                |                                                                                                                             |  |
| 627, 635                       | Bahamas                | <500      | <0.5 <sup>[12]</sup>       | 1-5 <sup>[12]</sup>       | n.a.                  | n.a.                     |                                |                                                                                                                             |  |
| 1050, 1052                     | Blake Nose             | ~500      | <0.5 <sup>[13,14]</sup>    | 1-5 <sup>[13,14]</sup>    | n.a.                  | n.a.                     |                                |                                                                                                                             |  |
|                                | Bass River             | 30        | 0.6 <sup>[15,16,17]</sup>  | 1.1 <sup>[15,16,17]</sup> | 45 <sup>[17]</sup>    | 100 <sup>[17]</sup>      |                                |                                                                                                                             |  |

continuation

| Sites     | Location                                      | Depth (m) | POC (wt%)<br>pre-OAE2   | OAE2                     | POC/Pr <sub>OT</sub><br>pre-OAE2 | OAE2                  | Biomarkers, TM<br>pre-OAE2              | OAE2                                                   |
|-----------|-----------------------------------------------|-----------|-------------------------|--------------------------|----------------------------------|-----------------------|-----------------------------------------|--------------------------------------------------------|
|           | <i>AVERAGE</i>                                |           | ~0.5                    | ~1                       | 45                               | 100                   |                                         |                                                        |
|           | <b>NORTH-EASTERN COAST</b>                    |           |                         |                          |                                  |                       |                                         |                                                        |
|           | Wunstorf Germany                              | ~100      | <0.1 <sup>[21,22]</sup> | 0.7 <sup>[21,22]</sup>   | 10 <sup>[21,22]</sup>            | 33 <sup>[21,22]</sup> |                                         | Si/Al, K/Al, Mn/Al rise <sup>[21]</sup>                |
|           | Eastborn England                              | ~100      | ~0.1 <sup>[23]</sup>    | 0.2 <sup>[23]</sup>      | n.a.                             | n.a.                  | low Mo <sup>[30]</sup>                  | fall of I/Ca <sup>[31]</sup>                           |
|           | Vocontian Basin France                        | ~200      | ~0.1 <sup>[22,23]</sup> | 0.5-1 <sup>[22,23]</sup> | n.a.                             | n.a.                  | low Fe <sub>7</sub> /Al <sup>[30]</sup> | and Mn, low Mo and Fe <sub>7</sub> /Al <sup>[30]</sup> |
| 549       | Goban Spur<br><i>AVERAGE</i>                  | <700      | <0.1 <sup>[13,14]</sup> | <1 <sup>[13,14]</sup>    | n.a.                             | n.a.                  |                                         |                                                        |
|           | <b>TETHYS GATEWAY</b>                         |           | ~0.1                    | ~1                       | 10                               | 33                    |                                         |                                                        |
|           | Coast of Spain                                | <700      | <0.5 <sup>[24]</sup>    | 0.5-1 <sup>[24]</sup>    | n.a.                             | n.a.                  |                                         |                                                        |
| El Chorro | Coast of Spain                                | <700      | <0.5 <sup>[24]</sup>    | 1-5 <sup>[24]</sup>      | n.a.                             | n.a.                  |                                         |                                                        |
| Hedfonda  | Coast of Spain                                | <700      | 0.5-1 <sup>[9]</sup>    | 0.5-1 <sup>[9]</sup>     | n.a.                             | 750 <sup>[9]</sup>    |                                         |                                                        |
| Manilva   | Coast of Spain                                | <700      | n.d.                    | 0.31 <sup>[8]</sup>      | n.a.                             | n.a.                  |                                         |                                                        |
|           | Coast of N-Africa and Spain<br><i>AVERAGE</i> | <700      | ~0.5                    | ~1                       |                                  | 750                   |                                         |                                                        |

n.a. = not available; n.d. = not detected; [1]: Thurow et al., 1988; [2]: Kraal et al., 2010b; [3]: Sinninghe Damsté and Köster, 1998; [4]: Kuypers et al., 2002; [5]: Sinninghe Damsté et al., 2010; [6]: Urquhart et al., 2007; [7]: Lancelot et al., 1980; [8] Herbin et al., 1986; [9]: Mort et al., 2007; [10] Meyers et al., 2001; [11]: Snow et al., 2005; [12]: Austin et al., 1986; [13]: Norris et al., 2001; [14]: Barker et al., 2001; [15]: Sugarman et al., 1999; [16]: Bowman and Bralower, 2005; [17]: this study; [18]: van Bentum et al., 2009; [19]: Nederbragt et al., 2004; [20]: Kolonic et al., 2005; [21]: Hetzel et al., 2011; [22]: Arthur and Dean, 1988; [23]: Voigt, 2000; [24]: Rodriguez-Tovar et al., 2010; [25]: Kuypers et al., 2004; [26]: Kuhnt et al., 1990; [27]: Mort et al., 2008; [28]: M. M. M. Kuypers, personal communication; [29]: Hetzel et al., 2009; [30]: Owens et al., 2012; [31]: van Bentum et al., 2012; [32]: Pancost et al., 2004; [33]: Kuhnt and Wiedmann, 1995

Table S2: Water cycle: Reservoirs and fluxes for pre-OAE2 and OAE2 conditions as implemented in the multi-box model. Note that several fluxes change direction from pre-OAE2 to OAE2 conditions.

| Box Name | Water reservoir |          | Description<br>units in $Tm^3$                                        |
|----------|-----------------|----------|-----------------------------------------------------------------------|
|          | pre-OAE2        | OAE2     |                                                                       |
| W1s      | 1522.11         | 1554.12  | Surface water of the central open ocean                               |
| W1i      | 8623.65         | 8805.83  | Intermediate water of the central open ocean                          |
| W1b      | 38518.87        | 40583.26 | Bottom water of the central open ocean                                |
| W2s      | 254.6           | 259.51   | Surface water of the southern open ocean                              |
| W2i      | 1527.58         | 1557.09  | Intermediate water of the southern open ocean                         |
| W2b      | 7056.33         | 7408.83  | Bottom water of the southern open ocean                               |
| W3s      | 53.47           | 227.61   | Surface water of the Western Interior Seaway                          |
| W3b      | 139.12          | 387.49   | Shallow bottom water of the Western Interior Seaway                   |
| W4s      | 129.37          | 202.61   | Surface water of the northern coast                                   |
| W4b      | 340.46          | 461.35   | Shallow bottom water of the northern coast                            |
| W5s      | 129.17          | 202.41   | Surface water of the southern coast                                   |
| W5b      | 340.21          | 461.1    | Shallow bottom water of the southern coast                            |
| W6s      | 47.75           | 76.25    | Surface water of the north-eastern coast                              |
| W6b      | 128.28          | 180.06   | Shallow bottom water of the north-eastern coast                       |
| W7s      | 35.66           | 34.29    | Surface water of the Tethys gateway                                   |
| W7b      | 91.35           | 125.63   | Shallow bottom water of the Tethys gateway                            |
| Name     | Water flux (Sv) |          | Description<br>( $\times 3.1536$ for $Tm^3 y^{-1}$ )                  |
|          | pre-OAE2        | OAE2     |                                                                       |
| F1       | 4.91            | 7.09     | Net surface water flux from W1s to the Pacific Ocean                  |
| F3       | 9.26            | 15.15    | Net intermediate water flux from W1i to the Pacific Ocean             |
| F6       | 13.75           | 21.98    | Net bottom water flux from the Pacific Ocean to W1b                   |
| F7       | 1.3             | 6.67     | Net surface water flux from the Tethys gateway to W7s                 |
| F10      | 0.88            | 6.47     | Net bottom water flux from W7b to the Tethys gateway                  |
| F11      | 1.32            | 1.32     | Evaporation in W1s                                                    |
| F12      | 0.81            | 0.81     | Precipitation in W1s                                                  |
| F13      | 6.57            | 7.46     | Surface water flux from W4s to W1s                                    |
| F14      | 0.59            | 3.36     | Surface water flux from W1s to W6s                                    |
| F15      | 0.65            | 4.15     | Surface water flux from W7s to W1s                                    |
| F16      | 10.6            | 17.13    | Downwelling from W1s to W1i                                           |
| F17      | 2.89            | 7.83     | Upwelling from W1i to W1s                                             |
| F18      | 1.02            | 1.17     | Surface water flux from W5s to W2s<br>(Changes direction during OAE2) |
| F19      | 1.75            | 2.49     | Surface water flux from W1s to W3s                                    |
| F20      | 10.35           | 9.25     | Intermediate water flux from W1i to W3b                               |
| F21      | 5.64            | 13.77    | Shallow bottom water flux from W4b to W1i                             |
| F22      | 0.61            | 2.89     | Intermediate water flux from W1i to W6b                               |
| F23      | 0.12            | 8.64     | Intermediate water flux from W1i to W7b                               |
| F24      | 4.65            | 2.73     | Shallow bottom water flux from W5b to W2i                             |
| F25      | 0.12            | 5.86     | Deep bottom water flux from W1b to W7b                                |
| F26      | 1.71            | 1.75     | Downwelling water flux from W7s to W7b                                |
| F27      | 2.12            | 3.44     | Upwelling water flux from bottom W7b to W7s                           |
| F28      | 0.75            | 1.31     | Downwelling water flux from W5s to W5b                                |
| F29      | 4.38            | 5.74     | Upwelling water flux from W5b to W5s                                  |

continuation

| Name | Water flux (Sv) |       | Description<br>( $\times 3.1536$ for $Tm^3 y^{-1}$ )                         |
|------|-----------------|-------|------------------------------------------------------------------------------|
|      | pre-OAE2        | OAE2  |                                                                              |
| F30  | 0.3             | 0.3   | River water flux to W5st                                                     |
| F31  | 5.21            | 6.05  | Downwelling water flux from W3s to W3b                                       |
| F32  | 6.9             | 7.38  | Upwelling water flux from W3b to W3s                                         |
| F33  | 5.39            | 3.83  | Downwelling water flux from W4s to W4b                                       |
| F34  | 8.24            | 4.62  | Upwelling water flux from W4b to W4s                                         |
| F35  | 1.1             | 3.17  | Downwelling water flux from W6s to W6b                                       |
| F36  | 0.43            | 1.15  | Upwelling water flux from W6b to W6s                                         |
| F37  | 8.38            | 19.16 | Downwelling water flux from W1i to W1b                                       |
| F38  | 21.23           | 33.31 | Upwelling water flux from W1b to W1i                                         |
| F39  | 3.53            | 3.97  | Surface water flux from W3s to W4s                                           |
| F40  | 0.08            | 2.61  | Surface water flux from W6s to W4s                                           |
| F41  | 0.15            | 1.25  | Surface water flux from W7s to W6s                                           |
| F42  | 0.91            | 2.95  | Surface water flux from W7s to W5s                                           |
| F43  | 0.41            | 4.62  | Shallow bottom water flux from W7b to W5b                                    |
| F44  | 1.46            | 1.73  | Shallow bottom water flux from W6b to W7b<br>(Changes direction during OAE2) |
| F45  | 0.18            | 6.63  | Shallow bottom water flux from W4b to W6b<br>(Changes direction during OAE2) |
| F46  | 8.67            | 7.93  | Shallow bottom water flux from W3b to W4b                                    |
| F47  | 3.85            | 4.59  | Surface water flux from W1s to W2s                                           |
| F48  | 8.27            | 6.87  | Surface water flux from W2s to W1s                                           |
| F49  | 8.34            | 2.1   | Intermediate water flux from W1i to W5b                                      |
| F50  | 9.92            | 11    | Intermediate water flux from W1i to W2i                                      |
| F51  | 12.42           | 11.79 | Intermediate water flux from W2i to W1i                                      |
| F52  | 15.37           | 17.73 | Deep bottom water flux from W1b to W2b                                       |
| F53  | 14.6            | 15.76 | Deep bottom water flux from W2b to W1b                                       |
| F54  | 3.82            | 8.85  | Surface water flux from W5s to W1s                                           |
| F55  | 0.12            | 0.15  | Downwelling water flux from W2s to W2i                                       |
| F56  | 3.51            | 3.6   | Upwelling water flux from W2i to W2s                                         |
| F57  | 0.37            | 0.37  | Downwelling water flux from W2i to W2b                                       |
| F58  | 1.62            | 1.9   | Upwelling water flux from bottom W2b to W2i                                  |
| F59  | 0.48            | 0.45  | Shallow bottom water flux from W5b to W2b<br>(Changes direction during OAE2) |
| R3   | 0.1             | 0.15  | River water flux to W3s                                                      |
| R4   | 0.1             | 0.1   | River water flux to W4s                                                      |
| R6   | 0.01            | 0.01  | River water flux to W6s                                                      |

Table S3: Carbon cycle: Reservoir sizes and fluxes for pre-OAE2 and OAE2 conditions and pre-OAE2 biogeochemical fluxes as implemented in the multi-box model. Note that all OAE2 reservoirs and fluxes, including the ones in Table S4 and S5, are the ones obtained after equilibrium.

| Name  | C reservoir |        | Description                                                                 |
|-------|-------------|--------|-----------------------------------------------------------------------------|
|       | pre-OAE2    | OAE2   | units in Tmol C                                                             |
| POC1s | 4.84        | 4.54   | Organic C in the surface water of the central open ocean                    |
| POC1i | 9.14        | 8.58   | Organic C in the intermediate water of the central open ocean               |
| POC1b | 8.17        | 7.67   | Organic C in the bottom water of the central open ocean                     |
| POC2s | 2.16        | 1.74   | Organic C in the surface water of the southern open ocean                   |
| POC2i | 6.48        | 5.23   | Organic C in the intermediate water of the southern open ocean              |
| POC2b | 2.24        | 1.81   | Organic C in the bottom water of the southern open ocean                    |
| POC3s | 0.23        | 0.52   | Organic C in the surface water of the Western Interior Seaway               |
| POC3b | 0.01        | 0.03   | Organic C in the bottom water of the Western Interior Seaway                |
| POC4s | 0.69        | 0.49   | Organic C in the surface water of the northern coast                        |
| POC4b | 0.07        | 0.05   | Organic C in the bottom water of the northern coast                         |
| POC5s | 1.1         | 1.37   | Organic C in the surface water of the southern coast                        |
| POC5b | 0.29        | 0.36   | Organic C in the bottom water of the southern coast                         |
| POC6s | 0.05        | 0.07   | Organic C in the surface water of the north-eastern coast                   |
| POC6b | 0.01        | 0.02   | Organic C in the bottom water of the north-eastern coast                    |
| POC7s | 0.04        | 0.03   | Organic C in the surface water of the Tethys gateway                        |
| POC7b | 0.01        | 0.01   | Organic C in the bottom water of the Tethys gateway                         |
| Name  | C flux      |        | Description                                                                 |
|       | pre-OAE2    | OAE2   | units in Tmol C y <sup>-1</sup>                                             |
| BCF1  | 163.79      | 153.79 | Primary productivity in the central open ocean                              |
| BCF2  | 142.73      | 134.01 | Remineralization in the surface water of the central open ocean             |
| BCF3  | 16.38       | 15.28  | Remineralization in the intermediate water of the central open ocean        |
| BCF4  | 4.67        | 4.38   | Remineralization in the bottom water of the central open ocean              |
| BCF5  | 0.02        | 0.015  | Organic C burial in the central open ocean                                  |
| BCF6  | 224         | 180.89 | Primary productivity in the southern open ocean                             |
| BCF7  | 195.2       | 157.62 | Remineralization in the surface water of the southern open ocean            |
| BCF8  | 22.4        | 18.09  | Remineralization in the intermediate water of the southern open ocean       |
| BCF9  | 6.38        | 5.15   | Remineralization in the bottom water of the southern open ocean             |
| BCF10 | 0.03        | 0.02   | Organic C burial in the southern open ocean                                 |
| BCF11 | 45.76       | 105.16 | Primary productivity in the Western Interior Seaway                         |
| BCF12 | 39.81       | 91.49  | Remineralization in the surface water of the Western Interior Seaway        |
| BCF13 | 5.83        | 13.39  | Remineralization in the shallow bottom water of the Western Interior Seaway |
| BCF14 | 0.16*       | 0.28   | Organic C burial in the Western Interior Seaway                             |
| BCF15 | 104.64      | 75.16  | Primary productivity in the northern coast                                  |
| BCF16 | 91.04       | 65.39  | Remineralization in the surface water of the northern coast                 |
| BCF17 | 13.31       | 9.57   | Remineralization in the shallow bottom water of the northern coast          |
| BCF18 | 0.29*       | 0.2    | Organic C burial in the northern coast                                      |
| BCF19 | 168.3       | 210.01 | Primary productivity in the southern coast                                  |
| BCF20 | 146.42      | 182.7  | Remineralization in the surface water of the southern coast                 |
| BCF21 | 21.25       | 26.52  | Remineralization in the shallow bottom water of the southern coast          |
| BCF22 | 0.63*       | 0.77   | Organic C burial in the southern coast                                      |
| BCF23 | 4.25        | 6.14   | Primary productivity in the north-eastern coast                             |
| BCF24 | 3.7         | 5.34   | Remineralization in the surface water of the north-eastern coast            |

continuation

| Name  | C flux   |       | Description<br>units in Tmol C y <sup>-1</sup>                              |
|-------|----------|-------|-----------------------------------------------------------------------------|
|       | pre-OAE2 | OAE2  |                                                                             |
| BCF25 | 0.54     | 0.78  | Remineralization in the shallow bottom water of the north-eastern coast     |
| BCF26 | 0.01     | 0.02  | Organic C burial in the north-eastern coast                                 |
| BCF27 | 24       | 22.19 | Primary productivity in the Tethys gateway                                  |
| BCF28 | 20.88    | 19.3  | Remineralization in the surface water of the Tethys gateway                 |
| BCF29 | 3.06     | 2.83  | Remineralization in the shallow bottom water of the Tethys gateway          |
| BCF30 | 0.069    | 0.057 | Organic C burial in the Tethys gateway                                      |
| BCF31 | 21.06    | 19.78 | Organic C export to the intermediate water in the central open ocean        |
| BCF32 | 4.68     | 4.4   | Organic C export to the bottom water in the central open ocean              |
| BCF33 | 28.8     | 23.26 | Organic C export to the intermediate water in the southern open ocean       |
| BCF34 | 6.4      | 5.17  | Organic C export to the bottom water in the southern open ocean             |
| PCF35 | 5.95     | 13.67 | Organic C export to the shallow bottom water in the Western Interior Seaway |
| BCF36 | 13.60    | 9.77  | Organic C export to the shallow bottom water in the northern coast          |
| BCF37 | 21.88    | 27.3  | Organic C export to the shallow bottom water in the southern coast          |
| BCF38 | 0.55     | 0.8   | Organic C export to the shallow bottom water in the north-eastern coast     |
| BCF39 | 3.12     | 2.89  | Organic C export to the shallow bottom water in the Tethys gateway          |

Table S4: Phosphorus cycle: Reservoir sizes and fluxes for pre-OAE2 and OAE2 conditions.

| Name                                     | P reservoir<br>pre-OAE2 | OAE2   | Description<br>units in Tmol P                                            |
|------------------------------------------|-------------------------|--------|---------------------------------------------------------------------------|
| SRP1s                                    | 0.68                    | 0.64   | Soluble reactive P in the surface water of the open ocean                 |
| SRP1i                                    | 13.6                    | 10.48  | Soluble reactive P in the intermediate water of the open ocean            |
| SRP1b                                    | 59.7                    | 52.86  | Soluble reactive P in the bottom water of the open ocean                  |
| SRP2s                                    | 0.04                    | 0.03   | Soluble reactive P in the surface water of the southern open ocean        |
| SRP2i                                    | 3.29                    | 2.64   | Soluble reactive P in the intermediate water of the southern open ocean   |
| SRP2b                                    | 11.98                   | 10.34  | Soluble reactive P in the bottom water of the southern open ocean         |
| SRP3s                                    | 0.06                    | 0.13   | Soluble reactive P in the surface water of the Western Interior Seaway    |
| SRP3b                                    | 0.21                    | 0.47   | Soluble reactive P in the bottom water of the Western Interior Seaway     |
| SRP4s                                    | 0.15                    | 0.1    | Soluble reactive P in the surface water of the northern coast             |
| SRP4b                                    | 0.56                    | 0.52   | Soluble reactive P in the shallow bottom water of the northern coast      |
| SRP5s                                    | 0.08                    | 0.1    | Soluble reactive P in the surface water of the southern coast             |
| SRP5b                                    | 0.73                    | 0.95   | Soluble reactive P in the shallow bottom water of the southern coast      |
| SRP6s                                    | 0.02                    | 0.04   | Soluble reactive P in the surface water of the north-eastern coast        |
| SRP6b                                    | 0.13                    | 0.17   | Soluble reactive P in the shallow bottom water of the north-eastern coast |
| SRP7s                                    | 0.01                    | 0.01   | Soluble reactive P in the surface water of the Tethys gateway             |
| SRP7b                                    | 0.09                    | 0.15   | Soluble reactive P in the shallow bottom water of the Tethys gateway      |
| POP1s                                    | 0.046                   | 0.04   | Organic P in the surface water of the open ocean                          |
| POP1i                                    | 0.086                   | 0.08   | Organic P in the intermediate water of the open ocean                     |
| POP1b                                    | 0.077                   | 0.07   | Organic P in the bottom water of the open ocean                           |
| POP2s                                    | 0.02                    | 0.02   | Organic P in the surface water of the southern open ocean                 |
| POP2i                                    | 0.06                    | 0.05   | Organic P in the intermediate water of the southern open ocean            |
| POP2b                                    | 0.02                    | 0.02   | Organic P in the bottom water of the southern open ocean                  |
| POP3s                                    | 0.002                   | 0.005  | Organic P in the surface water of the Western Interior Seaway             |
| POP3b                                    | 0.0001                  | 0.0003 | Organic P in the shallow bottom water of the Western Interior Seaway      |
| POP4s                                    | 0.006                   | 0.005  | Organic P in the surface water of the northern coast                      |
| POP4b                                    | 0.0007                  | 0.0005 | Organic P in the shallow bottom water of the northern coast               |
| POP5s                                    | 0.01                    | 0.01   | Organic P in the surface water of the southern coast                      |
| POP5b                                    | 0.003                   | 0.003  | Organic P in the shallow bottom water of the southern coast               |
| POP6s                                    | 0.0005                  | 0.0007 | Organic P in the surface water of the north-eastern coast                 |
| POP6b                                    | 0.0001                  | 0.0002 | Organic P in the shallow bottom water of the north-eastern coast          |
| POP7s                                    | 0.0004                  | 0.0003 | Organic P in the surface water of the Tethys gateway                      |
| POP7b                                    | 0.0001                  | 0.0001 | Organic P in the shallow bottom water of the Tethys gateway               |
| Name                                     | P flux<br>pre-OAE2      | OAE2   | Description<br>units in Tmol P y <sup>-1</sup>                            |
| <b>Fluxes coupled to the water cycle</b> |                         |        |                                                                           |
| PF1                                      | 0.07                    | 0.09   | Surface [SRP] of the central open ocean times F1                          |
| PF3                                      | 0.46                    | 0.57   | Intermediate [SRP] of the central open ocean times F3                     |
| PF6                                      | 0.55                    | 0.88   | Bottom [SRP] of the Pacific Ocean times F6                                |
| PF7                                      | 0.004                   | 0.02   | Surface [SRP] of the Tethys gateway times F7                              |
| PF10                                     | 0.03                    | 0.24   | Bottom [SRP] of the Tethys gateway times F10                              |
| PF13                                     | 0.23                    | 0.12   | Surface [SRP] of the Tethys gateway times F13                             |
| PF14                                     | 0.008                   | 0.04   | Surface [SRP] of central open ocean times F14                             |
| PF15                                     | 0.008                   | 0.05   | Surface [SRP] of the Tethys gateway times F15                             |
| PF16                                     | 0.15                    | 0.22   | Surface [SRP] of the central open ocean times F16 (downwelling)           |



continuation

| Name | P flux   |        | Description                                                                                                             |
|------|----------|--------|-------------------------------------------------------------------------------------------------------------------------|
|      | pre-OAE2 | OAE2   | units in Tmol P y <sup>-1</sup>                                                                                         |
| PF17 | 0.14     | 0.29   | Intermediate [SRP] of the central open ocean times F17 (upwelling)                                                      |
| PF18 | 0.02     | 0.005  | Surface [SRP] of the southern coast times F18 in pre-OAE2<br>Surface [SRP] of the southern open ocean times F18 in OAE2 |
| PF19 | 0.02     | 0.03   | Surface [SRP] of the central open ocean times F19                                                                       |
| PF20 | 0.51     | 0.35   | Intermediate [SRP] of the central open ocean times F20                                                                  |
| PF21 | 0.29     | 0.48   | Bottom [SRP] of the northern coast times F21                                                                            |
| PF22 | 0.03     | 0.11   | Intermediate [SRP] of the central open ocean times F22                                                                  |
| PF23 | 0.006    | 0.32   | Intermediate [SRP] of the central open ocean times F23                                                                  |
| PF24 | 0.32     | 0.18   | Bottom [SRP] of the southern coast times F24                                                                            |
| PF25 | 0.006    | 0.24   | Bottom [SRP] of the central open ocean times F25                                                                        |
| PF26 | 0.02     | 0.02   | Surface [SRP] of the Tethys gateway times F26 (downwelling)                                                             |
| PF27 | 0.07     | 0.13   | Bottom [SRP] of the Tethys gateway times F27 (upwelling)                                                                |
| PF28 | 0.02     | 0.02   | Surface [SRP] of the southern coast times F28 (downwelling)                                                             |
| PF29 | 0.3      | 0.37   | Bottom [SRP] of the southern coast times F29 (upwelling)                                                                |
| PF30 | 0.01     | 0.01   | [SRP] of the South river times F30                                                                                      |
| PF31 | 0.18     | 0.11   | Surface [SRP] of the Western Interior Seaway times F31 (downwelling)                                                    |
| PF32 | 0.33     | 0.28   | Bottom [SRP] of the Western Interior Seaway times F32 (upwelling)                                                       |
| PF33 | 0.19     | 0.06   | Surface [SRP] of the northern coast times F33 (downwelling)                                                             |
| PF34 | 0.43     | 0.16   | Bottom [SRP] of the northern coast times F34 (upwelling)                                                                |
| PF35 | 0.02     | 0.05   | Surface [SRP] of the north-eastern coast times F35 (downwelling)                                                        |
| PF36 | 0.01     | 0.03   | Bottom [SRP] of the north-eastern coast times F36 (upwelling)                                                           |
| PF37 | 0.42     | 0.72   | Intermediate [SRP] of the central open ocean times F37                                                                  |
| PF38 | 1.04     | 1.37   | Bottom [SRP] of the central open ocean times F38                                                                        |
| PF39 | 0.12     | 0.07   | Surface [SRP] of the Western Interior Seaway times F39                                                                  |
| PF40 | 0.001    | 0.04   | Surface [SRP] of the north-eastern coast times F40                                                                      |
| PF41 | 0.002    | 0.02   | Surface [SRP] of the Tethys gateway times F41                                                                           |
| PF42 | 0.01     | 0.04   | Surface [SRP] of the Tethys gateway times F42                                                                           |
| PF43 | 0.01     | 0.17   | Bottom [SRP] of the Tethys gateway times F43                                                                            |
| PF44 | 0.05     | 0.07   | Bottom [SRP] of the north-eastern coast times F44 in pre-OAE2<br>Bottom [SRP] of the Tethys gateway times F44 in OAE2   |
| PF45 | 0.01     | 0.19   | Bottom [SRP] of the northern coast times F45<br>Bottom [SRP] of the north-eastern coast times F45                       |
| PF46 | 0.42     | 0.3    | Bottom [SRP] of the northern coast times F46                                                                            |
| PF47 | 0.05     | 0.06   | Surface [SRP] of the central open ocean times F47                                                                       |
| PF48 | 0.04     | 0.03   | Surface [SRP] of the southern open ocean times F48                                                                      |
| PF49 | 0.41     | 0.08   | Intermediate [SRP] of the central open ocean times F49                                                                  |
| PF50 | 0.49     | 0.41   | Intermediate [SRP] of the central open ocean times F50                                                                  |
| PF51 | 0.84     | 0.63   | Intermediate [SRP] of the southern open ocean times F51                                                                 |
| PF52 | 0.75     | 0.73   | Bottom [SRP] of the central open ocean times F52                                                                        |
| PF53 | 0.78     | 0.69   | Bottom [SRP] of the southern open ocean times F53                                                                       |
| PF54 | 0.08     | 0.14   | Surface [SRP] of the southern coast times F54                                                                           |
| PF55 | 0.0006   | 0.0006 | Surface [SRP] of the southern open ocean times F55 (downwelling)                                                        |
| PF56 | 0.24     | 0.19   | Intermediate [SRP] of the southern open ocean times F56 (upwelling)                                                     |
| PF57 | 0.03     | 0.02   | Intermediate [SRP] of the southern open ocean times F57                                                                 |
| PF58 | 0.09     | 0.08   | Bottom [SRP] of the southern open ocean times F58                                                                       |
| PF59 | 0.03     | 0.02   | Bottom [SRP] of the southern coast times F59 in pre-OAE2                                                                |

continuation

| Name  | P flux<br>pre-OAE2 | OAE2    | Description<br>units in Tmol P y <sup>-1</sup>                              |
|-------|--------------------|---------|-----------------------------------------------------------------------------|
|       |                    |         | Bottom [SRP] of the southern open ocean times F59 in OAE2                   |
| PR3   | 0.0004             | 0.0006  | [SRP] of the North-West river times R3                                      |
| PR4   | 0.0018             | 0.0018  | [SRP] of the North river times R4                                           |
| PR6   | 0.00001            | 0.00001 | [SRP] of the north-eastern river times R6                                   |
|       |                    |         | <b>Fluxes coupled to the C and O<sub>2</sub> cycles</b>                     |
| BPF1  | 1.55               | 1.45    | SRP uptake in the central open ocean                                        |
| BPF2  | 1.35               | 1.26    | SRP release in the surface water of the central open ocean                  |
| BPF3  | 0.155              | 0.15    | SRP release in the intermediate water of the central open ocean             |
| BPF4  | 0.04               | 0.04    | SRP release in the bottom water of the central open ocean                   |
| BPF5  | 0.0001             | 0.0001  | Organic P burial in the central open ocean                                  |
| BPF6  | 2.11               | 1.71    | SRP uptake in the southern open ocean                                       |
| BPF7  | 1.84               | 1.49    | SRP release in the surface water of the southern open ocean                 |
| BPF8  | 0.21               | 0.17    | SRP release in the intermediate water of the southern open ocean            |
| BPF9  | 0.06               | 0.05    | SRP release in the bottom water of the southern open ocean                  |
| BPF10 | 0.0002             | 0.0002  | Organic P burial in the southern open ocean                                 |
| BPF11 | 0.43               | 0.99    | SRP uptake in the Western Interior Seaway                                   |
| BPF12 | 0.38               | 0.86    | SRP release in the surface water of the Western Interior Seaway             |
| BPF13 | 0.06               | 0.13    | SRP release in the shallow bottom water of the Western Interior Seaway      |
| BPF14 | 0.0005             | 0.001   | Organic P burial in the Western Interior Seaway                             |
| BPF15 | 0.99               | 0.71    | SRP uptake in the northern coast                                            |
| BPF16 | 0.86               | 0.62    | SRP release in the surface water of the northern coast                      |
| BPF17 | 0.13               | 0.09    | SRP release in the shallow bottom water of the northern coast               |
| BPF18 | 0.001              | 0.001   | Organic P burial in the northern coast                                      |
| BPF19 | 1.59               | 1.98    | SRP uptake in the southern coast                                            |
| BPF20 | 1.38               | 1.72    | SRP release in the surface water of the southern coast                      |
| BPF21 | 0.20               | 0.26    | SRP release in the shallow bottom water of the southern coast               |
| BPF22 | 0.001              | 0.002   | Organic P burial in the southern coast                                      |
| BPF23 | 0.04               | 0.06    | SRP uptake in the north-eastern coast                                       |
| BPF24 | 0.03               | 0.05    | SRP release in the surface water of the north-eastern coast                 |
| BPF25 | 0.005              | 0.007   | SRP release in the shallow bottom water of the north-eastern coast          |
| BPF26 | 0.00005            | 0.00007 | Organic P burial in the north-eastern coast                                 |
| BPF27 | 0.23               | 0.21    | SRP uptake in the Tethys gateway                                            |
| BPF28 | 0.2                | 0.18    | SRP release in the surface water of the Tethys gateway                      |
| BPF29 | 0.03               | 0.03    | SRP release in the shallow bottom water of the Tethys gateway               |
| BPF30 | 0.0003             | 0.0003  | Organic P burial in the Tethys gateway                                      |
| BPF31 | 0.2                | 0.19    | Organic P export to the intermediate water in the central open ocean        |
| BPF32 | 0.04               | 0.04    | Organic P export to the bottom water in the central open ocean              |
| BPF33 | 0.27               | 0.22    | Organic P export to the intermediate water in the southern open ocean       |
| BPF34 | 0.06               | 0.05    | Organic P export to the bottom water in the southern open ocean             |
| BPF35 | 0.06               | 0.13    | Organic P export to the shallow bottom water in the Western Interior Seaway |
| BPF36 | 0.13               | 0.09    | Organic P export to the shallow bottom water in the northern coast          |
| BPF37 | 0.21               | 0.26    | Organic P export to the shallow bottom water in the southern coast          |
| BPF38 | 0.005              | 0.008   | Organic P export to the shallow bottom water in the north-eastern coast     |
| BPF39 | 0.03               | 0.03    | Organic P export to the shallow bottom water in the Tethys gateway          |
| FePB1 | 0.00014            | 0.00016 | Inorganic Fe-P burial in the central open ocean                             |
| CaPB1 | 0.00029            | 0.00029 | Inorganic Ca-P burial in the central open ocean                             |

## continuation

| Name  | P flux<br>pre-OAE2 | OAE2    | Description<br>units in Tmol P y <sup>-1</sup>       |
|-------|--------------------|---------|------------------------------------------------------|
| FePB2 | 0.00016            | 0.0002  | Inorganic Fe-P burial in the southern open ocean     |
| CaPB2 | 0.00037            | 0.00033 | Inorganic Ca-P burial in the southern open ocean     |
| FePB3 | 0.00043            | 0.00045 | Inorganic Fe-P burial in the Western Interior Seaway |
| CaPB3 | 0.0009             | 0.0022  | Inorganic Ca-P burial in the Western Interior Seaway |
| FePB4 | 0.0009             | 0.001   | Inorganic Fe-P burial in the northern coast          |
| CaPB4 | 0.0019             | 0.0018  | Inorganic Ca-P burial in the northern coast          |
| FePB5 | 0.0004             | 0.0004  | Inorganic Fe-P burial in the southern coast          |
| CaPB5 | 0.0017             | 0.0017  | Inorganic Ca-P burial in the southern coast          |
| FePB6 | 0.00005            | 0.00005 | Inorganic Fe-P burial in the north-eastern coast     |
| CaPB6 | 0.0001             | 0.00016 | Inorganic Ca-P burial in the north-eastern coast     |
| FePB7 | 0.0002             | 0.0003  | Inorganic Fe-P burial in the Tethys gateway          |
| CaPB7 | 0.0005             | 0.0005  | Inorganic Ca-P burial in the Tethys gateway          |

Table S5: Oxygen cycle: Reservoir sizes and fluxes for pre-OAE2 and OAE2 conditions as implemented in the multi-box model.

| Name                                     | O <sub>2</sub> reservoir pre-OAE2 |         | Description units Tmol O <sub>2</sub>                                                                                                         |
|------------------------------------------|-----------------------------------|---------|-----------------------------------------------------------------------------------------------------------------------------------------------|
| OX1i                                     | 987.95                            | 1323.70 | Dissolved O <sub>2</sub> in the intermediate water of the central open ocean                                                                  |
| OX1b                                     | 5777.83                           | 6991.77 | Dissolved O <sub>2</sub> in the bottom water of the central open ocean                                                                        |
| OX2i                                     | 54.28                             | 130.72  | Dissolved O <sub>2</sub> in the intermediate water of the southern open ocean                                                                 |
| OX2b                                     | 900.53                            | 1175.8  | Dissolved O <sub>2</sub> in the bottom water of the southern open ocean                                                                       |
| OX3b                                     | 17.77                             | 51.87   | Dissolved O <sub>2</sub> in the shallow bottom water of the Western Interior Seaway                                                           |
| OX4b                                     | 39.6                              | 64.38   | Dissolved O <sub>2</sub> in the shallow bottom water of the northern coast                                                                    |
| OX5b                                     | 10.11                             | 14.64   | Dissolved O <sub>2</sub> in the shallow bottom water of the southern coast                                                                    |
| OX6b                                     | 20.18                             | 30.8    | Dissolved O <sub>2</sub> in the shallow bottom water of the north-eastern coast                                                               |
| OX7b                                     | 12.78                             | 19.65   | Dissolved O <sub>2</sub> in the shallow bottom water of the Tethys gateway                                                                    |
| Name                                     | O <sub>2</sub> flux pre-OAE2 OAE2 |         | Description units in Tmol O <sub>2</sub> y <sup>-1</sup>                                                                                      |
| <b>Fluxes coupled to the water cycle</b> |                                   |         |                                                                                                                                               |
| OF3                                      | 33.44                             | 71.82   | Intermediate [O <sub>2</sub> ] of the central open ocean times F3                                                                             |
| OF6                                      | 90.76                             | 145.14  | Bottom [O <sub>2</sub> ] of the Pacific Ocean times F6                                                                                        |
| OF10                                     | 3.9                               | 31.9    | Shallow bottom [O <sub>2</sub> ] of the Tethys times F10                                                                                      |
| OF16                                     | 66.51                             | 107.51  | Intermediate [O <sub>2</sub> ] of the central open ocean times F16                                                                            |
| OF17                                     | 10.46                             | 37.11   | Bottom [O <sub>2</sub> ] of the central open ocean times F17                                                                                  |
| OF20                                     | 37.4                              | 43.86   | Intermediate [O <sub>2</sub> ] of the central open ocean times F20                                                                            |
| OF21                                     | 20.67                             | 60.59   | Bottom [O <sub>2</sub> ] of the northern coast times F21                                                                                      |
| OF22                                     | 2.2                               | 13.67   | Intermediate [O <sub>2</sub> ] of the central open ocean times F22                                                                            |
| OF23                                     | 0.45                              | 40.95   | Intermediate [O <sub>2</sub> ] of the central open ocean times F23                                                                            |
| OF24                                     | 4.37                              | 2.73    | Bottom [O <sub>2</sub> ] of the southern coast times F24                                                                                      |
| OF25                                     | 0.58                              | 31.84   | Bottom [O <sub>2</sub> ] of the central open ocean times F25                                                                                  |
| OF26                                     | 10.78                             | 11.04   | Surface [O <sub>2</sub> ] of the Tethys gateway times F26 (downwelling)                                                                       |
| OF27                                     | 9.36                              | 16.95   | Bottom [O <sub>2</sub> ] of the Tethys gateway times F27 (upwelling)                                                                          |
| OF28                                     | 4.62                              | 8.07    | Surface [O <sub>2</sub> ] of the southern coast times F28 (downwelling)                                                                       |
| OF29                                     | 4.1                               | 5.75    | Bottom [O <sub>2</sub> ] of the southern coast times F29 (upwelling)                                                                          |
| OF31                                     | 32.87                             | 38.18   | Surface [O <sub>2</sub> ] of the Western Interior Seaway times F31 (downwelling)                                                              |
| OF32                                     | 27.77                             | 31.13   | Bottom [O <sub>2</sub> ] of the Western Interior Seaway times F32 (upwelling)                                                                 |
| OF33                                     | 33.97                             | 24.17   | Surface [O <sub>2</sub> ] of the northern coast times F33 (downwelling)                                                                       |
| OF34                                     | 30.22                             | 20.32   | Bottom [O <sub>2</sub> ] of the northern coast times F34 (upwelling)                                                                          |
| OF35                                     | 7.22                              | 20.8    | Surface [O <sub>2</sub> ] of the north-eastern coast times F35 (downwelling)                                                                  |
| OF36                                     | 2.12                              | 6.23    | Bottom [O <sub>2</sub> ] of the north-eastern coast times F36 (upwelling)                                                                     |
| OF37                                     | 30.27                             | 90.81   | Intermediate [O <sub>2</sub> ] of the central open ocean times F37                                                                            |
| OF38                                     | 100.43                            | 180.96  | Bottom [O <sub>2</sub> ] of the central open ocean times F38                                                                                  |
| OF43                                     | 1.82                              | 22.78   | Bottom [O <sub>2</sub> ] of the Tethys gateway times F43                                                                                      |
| OF44                                     | 7.26                              | 8.53    | Bottom [O <sub>2</sub> ] of the north-eastern coast times F44 in pre-OAE2<br>Bottom [O <sub>2</sub> ] of the Tethys gateway times F44 in OAE2 |
| OF45                                     | 0.66                              | 35.73   | Bottom [O <sub>2</sub> ] of the northern coast times F45 in pre-OAE2<br>Bottom [O <sub>2</sub> ] of the north-eastern coast times F45 in OAE2 |
| OF46                                     | 34.92                             | 33.47   | Bottom [O <sub>2</sub> ] of the Western Interior Seaway times F46                                                                             |
| OF49                                     | 30.14                             | 9.94    | Intermediate [O <sub>2</sub> ] of the central open ocean times F49                                                                            |
| OF50                                     | 35.84                             | 52.13   | Intermediate [O <sub>2</sub> ] of the central open ocean times F50                                                                            |

continuation

| Name                                        | O <sub>2</sub> flux<br>pre-OAE2 | OAE2  | Description<br>units in Tmol O <sub>2</sub> y <sup>-1</sup>                                                                                   |
|---------------------------------------------|---------------------------------|-------|-----------------------------------------------------------------------------------------------------------------------------------------------|
| OF51                                        | 13.91                           | 31.22 | Intermediate [O <sub>2</sub> ] of the southern open ocean times F51                                                                           |
| OF52                                        | 72.71                           | 96.31 | Bottom [O <sub>2</sub> ] of the central open ocean times F52                                                                                  |
| OF53                                        | 58.76                           | 78.86 | Bottom [O <sub>2</sub> ] of the southern open ocean times F53                                                                                 |
| OF55                                        | 0.72                            | 0.94  | Surface [O <sub>2</sub> ] of the southern open ocean times F55 (downwelling)                                                                  |
| OF56                                        | 3.94                            | 9.5   | Intermediate [O <sub>2</sub> ] of the southern open ocean times F56 (upwelling)                                                               |
| OF57                                        | 0.41                            | 0.99  | Intermediate [O <sub>2</sub> ] of the southern open ocean times F57                                                                           |
| OF58                                        | 6.5                             | 9.5   | Bottom [O <sub>2</sub> ] of the southern open ocean times F58                                                                                 |
| OF59                                        | 0.45                            | 2.23  | Bottom [O <sub>2</sub> ] of the southern coast times F59 in pre-OAE2<br>Bottom [O <sub>2</sub> ] of the southern open ocean times F59 in OAE2 |
| <b>Fluxes coupled to the C and P cycles</b> |                                 |       |                                                                                                                                               |
| BOF3                                        | 21.32                           | 20.02 | O <sub>2</sub> consumption in the intermediate water of the central open ocean                                                                |
| BOF4                                        | 6.07                            | 5.7   | O <sub>2</sub> consumption in the bottom water of the central open ocean                                                                      |
| BOF8                                        | 29.16                           | 23.55 | O <sub>2</sub> consumption in the intermediate water of the southern open ocean                                                               |
| BOF9                                        | 8.3                             | 6.71  | O <sub>2</sub> consumption in the bottom water of the southern open ocean                                                                     |
| BOF13                                       | 7.58                            | 17.43 | O <sub>2</sub> consumption in the shallow bottom water in the Western Interior Seaway                                                         |
| BOF17                                       | 17.33                           | 12.46 | O <sub>2</sub> consumption in the shallow bottom water in the northern coast                                                                  |
| BOF21                                       | 27.67                           | 34.54 | O <sub>2</sub> consumption in the shallow bottom water in the southern coast                                                                  |
| BOF25                                       | 0.71                            | 1.02  | O <sub>2</sub> consumption in the shallow bottom water in the north-eastern coast                                                             |
| BOF29                                       | 3.98                            | 3.68  | O <sub>2</sub> consumption in the shallow bottom water in the Tethys gateway                                                                  |

Table S6: Linear equations as implemented in the model for fluxes in oxic conditions. The  $k_*$  is a rate constant ( $y^{-1}$ ). *SRP* is the reservoir of soluble reactive P, *POC* and *POP* are the reservoirs for particulate organic C and P, respectively.  $_s$ : surface water;  $_i$ : intermediate water;  $_b$ : bottom water.

| Flux                                                       | Linear equations                                                         |
|------------------------------------------------------------|--------------------------------------------------------------------------|
| <b>C cycle</b>                                             | <b>(Tmol C <math>y^{-1}</math>)</b>                                      |
| Primary productivity in surface ocean                      | $PP = k_{PP} \cdot SRP_s \cdot 106$ <sup>[1]</sup>                       |
| Inorganic C release in surface ocean                       | $CREL_s = k_{CREL_s} \cdot POC_s$ <sup>[1]</sup>                         |
| Inorganic C release in intermediate open ocean             | $CREL_i = k_{CREL_i} \cdot POC_i$ <sup>[1]</sup>                         |
| Inorganic C release in shallow/deep bottom ocean           | $CREL_b = k_{CREL_b} \cdot POC_b$ <sup>[1]</sup>                         |
| POC Export in surface to intermediate/shallow bottom ocean | $CEXP_s = POPEXP_s \cdot 106$ <sup>[1]</sup>                             |
| POC Export in intermediate to deep bottom open ocean       | $CEXP_i = POPEXP_i \cdot 106$ <sup>[1]</sup>                             |
| POC burial in coastal ocean                                | $CBUR = k_{CBUR} \cdot CEXP_s$ <sup>[1]</sup>                            |
| POC burial in open ocean                                   | $CBUR = k_{CBUR} \cdot (CEXP_s + CEXP_i)$ <sup>[2]</sup>                 |
| <b>P cycle</b>                                             | <b>(Tmol P <math>y^{-1}</math>)</b>                                      |
| SRP uptake in surface ocean                                | $SRPU = PP/106$ <sup>[1]</sup>                                           |
| SRP release in surface ocean                               | $PREL_s = CREL_s/106$ <sup>[1]</sup>                                     |
| SRP release in intermediate open ocean                     | $PREL_i = CREL_i/106$ <sup>[1]</sup>                                     |
| SRP release in shallow/deep bottom ocean                   | $PREL_b = k_{PREL_b} \cdot POP_b$ <sup>[1]</sup>                         |
| POP Export from surface to intermediate/shallow bottom     | $POPEXP_s = k_{POPEXP_s} \cdot POP_s$ <sup>[1]</sup>                     |
| POP Export from intermediate to deep bottom ocean          | $POPEXP_i = k_{POPEXP_i} \cdot POP_i$ <sup>[1]</sup>                     |
| POP burial in coastal ocean                                | $POPBUR = CBUR/200$ <sup>[3]</sup>                                       |
| POP burial in open ocean                                   | $POPBUR = CBUR/106$ <sup>[1]</sup>                                       |
| Ca-P burial in shallow/deep bottom ocean                   | $CaPBUR = k_{CaPBUR} \cdot PREL_b$ <sup>[1]</sup>                        |
| Fe-P burial in shallow/deep bottom ocean                   | $FePBUR = FePBUR_{oxic} \cdot \frac{[O_2]}{[O_2]_{crit}}$ <sup>[1]</sup> |
| <b>O<sub>2</sub> cycle</b>                                 | <b>(Tmol O<sub>2</sub> <math>y^{-1}</math>)</b>                          |
| O <sub>2</sub> consumption in intermediate open ocean      | $OCON_i = CREL_i \cdot 138/106$ <sup>[1]</sup>                           |
| O <sub>2</sub> consumption in shallow/deep bottom ocean    | $OCON_b = CREL_b \cdot 138/106$ <sup>[1]</sup>                           |

[1]Slomp and Van Cappellen, 2007, [2] This study, [3]Van Cappellen and Ingall, 1994

## References

- Arthur, M. A. and Dean, W. A. Pratt, L. M.: Geochemical and climatic effects of increased marine organic carbon burial at the Cenomanian-Turonian boundary, *Nature*, 335, 714–717, doi:10.1038/335714a0, 1988.
- Austin, J. A., Schlager, W., Palmer, A. A., and et al.: Site 632 A/B, in *Proceedings and initial reports (Part A) of the Ocean Drilling Program, Leg 101*, College Station, Texas A&M University, p. 569, doi: 10.2973/odp.proc.ir.101.111, 1986.
- Barker, C. E., Pawlewicz, M., and Cobabe, E. A.: Deposition of sedimentary organic matter in black shale facies indicated by the geochemistry and petrography of high-resolution samples, Blake Nose, western North Atlantic, Geological Society, London, Special Publications, 183, 49–72, doi:10.1144/GSL.SP.2001.183.01.03, 2001.
- Bowman, A. R. and Bralower, T. J.: Paleooceanographic significance of high-resolution carbon isotope records across the Cenomanian-Turonian boundary in the Western Interior and New Jersey coastal plain, USA, *Marine Geology*, 217, 305–321, 2005.
- Herbin, J. P., Montadert, L., Miiller, C., Gomez, R., Thurow, J., and Wiedmann, J.: Organic-rich sedimentation at

- the Cenomanian-Turonian boundary in oceanic and coastal basins in the North Atlantic and Tethys, *Geological Society Special Publication*, 21, 389–422, 1986.
- Hetzel, A., Böttcher, M. E., Wortmann, U. G., and Brumsack, H.-J.: Paleo-redox conditions during OAE 2 reflected in Demerara Rise sediment geochemistry (ODP Leg 207), *Palaeogeography Palaeoclimatology Palaeoecology*, 273, 302–328, 2009.
- Hetzel, A., März, C., Vogt, C., and Brumsack, H.-J.: Geochemical environment of Cenomanian-Turonian black shale deposition at Wunstorf (northern Germany), *Cretaceous Research*, 32, 480–494, 2011.
- Kolonic, S., Wagner, T., Forster, A., Sinninghe Damsté, J. S., Walsworth-Bell, B., Erba, E., Turgeon, S., Brumsack, H.-J., Hassane Chellai, E., Tsikos, H., Kuhnt, W., and Kuypers, M. M. M.: Black shale deposition on the northwest African Shelf during the Cenomanian-Turonian oceanic anoxic event: Climate coupling and global organic carbon burial, *Paleoceanography*, 20, 95–128, doi:10.1029/2003PA000950, 2005.
- Kraal, P., Slomp, C. P., Forster, A., and Kuypers, M. M. M.: Phosphorus cycling from the margin to abyssal depths in the proto-Atlantic during oceanic anoxic event 2, *Palaeogeography Palaeoclimatology Palaeoecology*, 295, 42–54, 2010b.
- Kuhnt, W. and Wiedmann, J.: Cenomanian–Turonian source rocks: paleobiogeographic and paleoenvironmental aspects, In: Huc, A. Y. (Ed.) : *Paleogeography, Paleoclimate and Source Rocks*. AAPG studies in Geology, 40, 213–231, 1995.
- Kuhnt, W., Herbin, J. P., Thurow, J. W., and Wiedmann, J.: Distribution of Cenomanian-Turonian organic facies in the western Mediterranean and along the Adjacent Atlantic Margin, *AAPG Studies in Geology*, 30, 133–160, 1990.
- Kuypers, M. M. M., Pancost, R. D., Nijenhuis, I. A., and Sinninghe Damsté, J. S.: Enhanced productivity led to increased organic carbon burial in the euxinic North Atlantic basin during the late Cenomanian oceanic anoxic event, *Paleoceanography*, 17, 1–13, 2002.
- Kuypers, M. M. M., Lourens, L. J., Rijpstra, W. I. C., Pancost, R. D., Nijenhuis, I. A., and Sinninghe Damsté, J. S.: Orbital forcing of organic carbon burial in the proto-North Atlantic during oceanic anoxic event 2, *Earth and Planetary Science Letters*, 228, 465–482, 2004.
- Lancelot, Y., Winterer, E. L., and et al.: *Init. Rep. Deep Sea Drilling Project 50*: Washington (U.S. Govt. Printing Office), 1980.
- Meyers, S., Sageman, B., and Hinnov, L.: Integrated quantitative stratigraphy of the Cenomanian-Turonian Bridge Creek Limestone Member using evolutive harmonic analysis and stratigraphic modeling, *Journal of Sedimentary Research*, 71, 627–643, 2001.
- Mort, H. P., Adatte, T., Föllmi, K. B., Keller, G., Steinmann, P., Matera, V., Berner, Z., and Stüben, D.: Phosphorus and the roles of productivity and nutrient recycling during oceanic anoxic event 2, *Geology*, 35, 483–486, 2007.
- Mort, H. P., Adatte, T., Keller, G., Bartels, D., Föllmi, K. B., Steinmann, P., Berner, Z., and Chellai, E. H.: Organic carbon deposition and phosphorus accumulation during Oceanic Anoxic Event 2 in Tarfaya, Morocco, *Cretaceous Research*, 29, 1008–1023, 2008.
- Nederbragt, A. J., Thurow, J., Vonhof, H., and Brumsack, H.-J.: Modelling oceanic carbon and phosphorus fluxes: implications for the cause of the late Cenomanian Oceanic Anoxic Event (OAE2), *Journal of the Geological Society of London*, 161, 721–728, doi:10.1144/0016-764903-075, 2004.
- Norris, R. D., Kroon, D., and Klaus, A.: Cretaceous-Paleogene climatic evolution of the western North Atlantic: results from ODP Leg 171B, Blake Nose, In Kroon, D., Norris, R. D., and Klaus, A. (Eds.), *Proc. ODP, Sci. Results, 171B*: College Station, TX (Ocean Drilling Program), 161, 1–10, doi:10.2973/odp.proc.sr.171b.101, 2001.
- Owens, J. D., Lyons, T. W., Li, X., Macleod, K. G., Gordon, G., Kuypers, M. M. M., Anbar, A., Kuhnt, W., and Severmann, S.: Iron isotope and trace metal records of iron cycling in the proto-North Atlantic during the Cenomanian-Turonian oceanic anoxic event (OAE-2), *Palaeogeography*, 27, 1–13, doi:10.1029/2012PA002328, 2012.

- Pancost, R. D., Crawford, N., Magness, S., Turner, A., Jenkyns, H. C., and Maxwell, J. R.: Further evidence for the development of photic-zone euxinic conditions during Mesozoic oceanic anoxic events, *Journal of the Geological Society of London*, 161, 353–364, doi:10.1144/0016764903-059, 2004.
- Rodríguez-Tovar, F. J., Uchman, A., Payros, A., Orue-Etxebarria, X., Apellaniz, E., and Molina, E.: Sea-level dynamics and palaeoecological factors affecting trace fossil distribution in Eocene turbiditic deposits (Gorrondatxe section, N Spain), *Palaeogeography Palaeoclimatology Palaeoecology*, 285, 50–65, doi:10.1016/j.palaeo.2009.10.022, 2010.
- Sinninghe Damsté, J. S. and Köster, J.: A euxinic southern North Atlantic Ocean during the Cenomanian-Turonian oceanic anoxic event, *Earth and Planetary Science Letters*, 158, 165–173, doi:10.5194/cp-3-647-2007, 1998.
- Sinninghe Damsté, J. S., van Bentum, E. C., Reichart, G.-J., Pross, P., and Schouten, S.: A CO<sub>2</sub> decrease-driven cooling and increased latitudinal temperature gradient during the mid-Cretaceous Oceanic Anoxic Event 2, *Earth and Planetary Science Letters*, 293, 97–103, doi:10.1016/j.epsl.2010.02.027, 2010.
- Slomp, C. P. and Van Cappellen, P.: The global marine phosphorus cycle: sensitivity to oceanic circulation, *Biogeosciences*, 4, 155–171, 2007.
- Snow, L. J., Duncan, R. A., and Bralower, T. J.: Trace element abundances in the Rock Canyon anticline, Pueblo, Colorado, marine sedimentary section and their relationship to Caribbean plateau construction and oxygen anoxic event 2, *Paleoceanography*, 20, doi:10.1029/2004PA001093, 2005.
- Sugarman, P. J., Miller, K. G., Olsson, R. K., Browning, J. V., Wright, J. D., de Romero, L. M., White, T. S., Muller, F. L., and Uptegrove, J.: The Cenomanian-Turonian carbon burial event, Bass River, NJ, USA: Geochemical, paleoecological, and sea-level changes, *Journal of Foraminiferal Research*, 29, 438–452, 1999.
- Thurrow, J. W., Moullade, M., Brumsack, H.-J., Masure, E., Taugourdou, J., and Dunham, K.: The Cenomanian-Turonian Boundary Event (CTBE) at Leg 103/Hole 641A, *Proceedings of the Ocean Drilling Program Scientific Results*, 103, 587–634, 1988.
- Topper, R. P. M., Trabucho Alexandre, J., Tuenter, E., and Meijer, P. Th.: A regional ocean circulation model for the mid-Cretaceous North Atlantic Basin: implications for black shale formation, *Climate of the past*, 7, 277–297, 2011.
- Urquhart, E., Gardin, S., Leckie, R. M., Wood, S. A., Pross, J., Georgescu, M. D., Ladner, B., and Takata, H.: A Paleontological Synthesis of ODP Leg 210, Newfoundland Basin, In Tucholke, B.E and Sibuet, J. C and Klaus, A. (Eds.), *Proc. ODP, Sci. Results*, 210: College Station, TX (Ocean Drilling Program), pp. 1–53, 2007.
- van Bentum, E. C., Hetzel, A., Brumsack, H.-J., Forster, A., Reichart, G.-J., and Sinninghe Damsté, J. S.: Reconstruction of water column anoxia in the equatorial Atlantic during the Cenomanian-Turonian oceanic anoxic event using biomarker and trace metal proxies, *Palaeogeography Palaeoclimatology Palaeoecology*, 280, 489–498, 2009.
- van Bentum, E. C., Reichart, G.-J., and Sinninghe-Damsté, J. S.: Organic matter provenance, palaeoproductivity and bottom water anoxia during the Cenomanian/Turonian oceanic anoxic event in the Newfoundland Basin (northern proto North Atlantic Ocean), *Organic Geochemistry*, 50, 11–18, 2012.
- Van Cappellen, P. and Ingall, E. D.: Benthic phosphorus regeneration, net primary production, and ocean anoxia: A model of the coupled marine biogeochemical cycles of carbon and phosphorus, *Paleoceanography*, 9, 677–692, 1994.
- Voigt, S.: Cenomanian-Turonian composite  $\delta^{13}\text{C}$  curve for Western and Central Europe: the role of organic and inorganic carbon fluxes, *Palaeogeography Palaeoclimatology Palaeoecology*, 160, 91–104, 2000.
